# Supplementary material
Source: publisher site journal article supplement (https://www.spandidos-publications.com/3249/downloadSupplementary)

Figure S1. Two replicate validation of cleaved caspase-3, Bax and Bcl2 expression by western blot analyses. SAP, severe acute pancreatitis; Dex, dexamethasone.

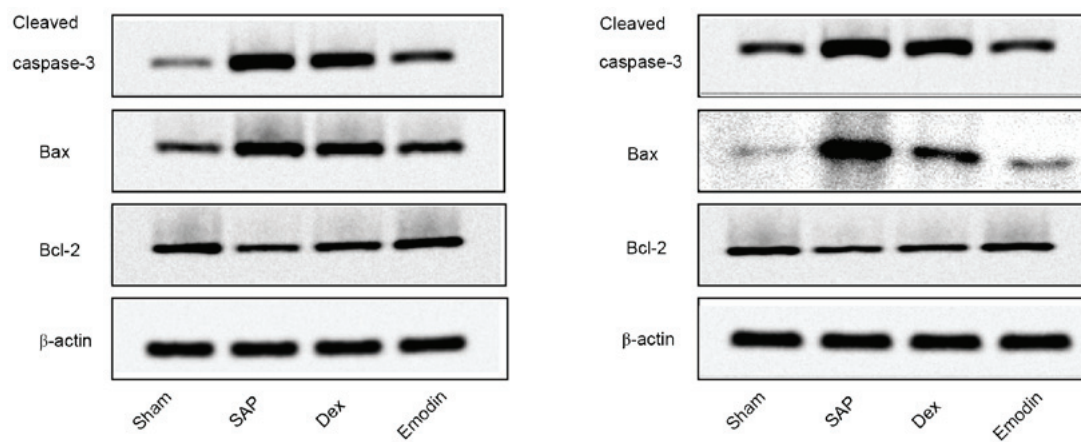

Figure S2. Two replicate validation of NLRP3, ASC and cleaved caspase-1 expression by western blot analyses. NLRP3, Nod-like receptor protein 3; ASC, apoptosis-associated speck-like protein containing a CARD; SAP, severe acute pancreatitis; Dex, dexamethasone.

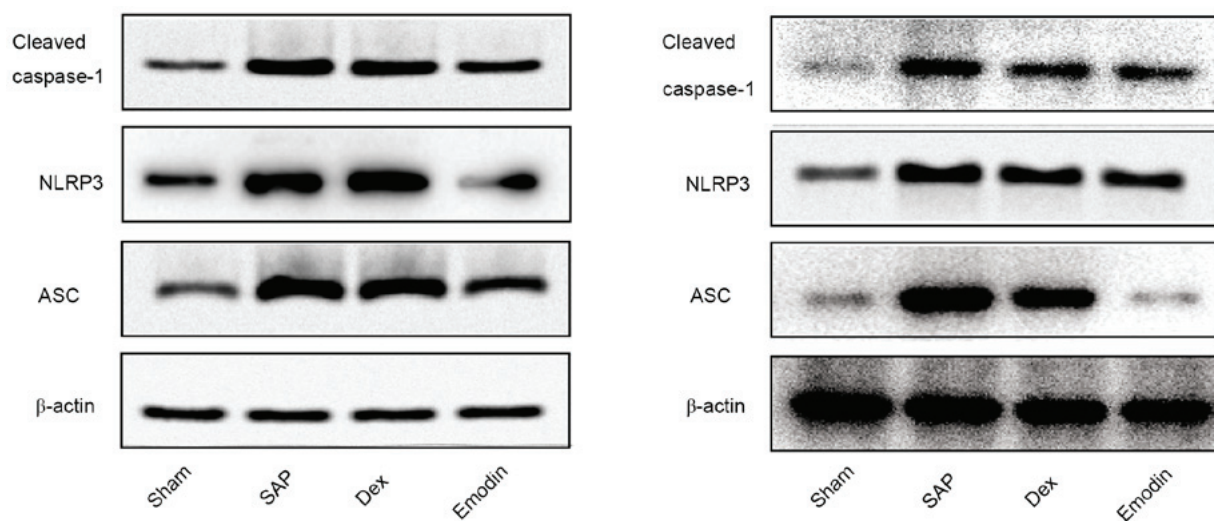

Figure S3. Two replicate validation of ICAM-1 expression by western blot analyses. SAP, severe acute pancreatitis; Dex, dexamethasone; ICAM-1, intercellular adhesion molecule 1.

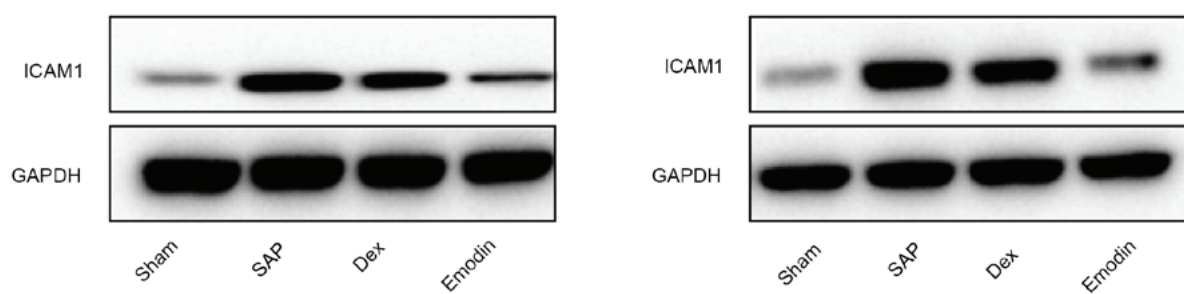

Supplement: Supplementary file 1 [file downloadSupplementary]
